# Supplementary material for: Inhibition of endothelial Cdk5 reduces tumor growth by promoting non-productive angiogenesis
Source: PubMed Central journal article supplement (PMC4868742; doi:10.18632/oncotarget.6842), 2016-01-08
Supplement: oncotarget-07-6088-s001.pdf [file oncotarget-07-6088-s001.pdf]

## Inhibition of endothelial Cdk5 reduces tumor growth by promoting non-productive angiogenesis

### Supplementary Materials

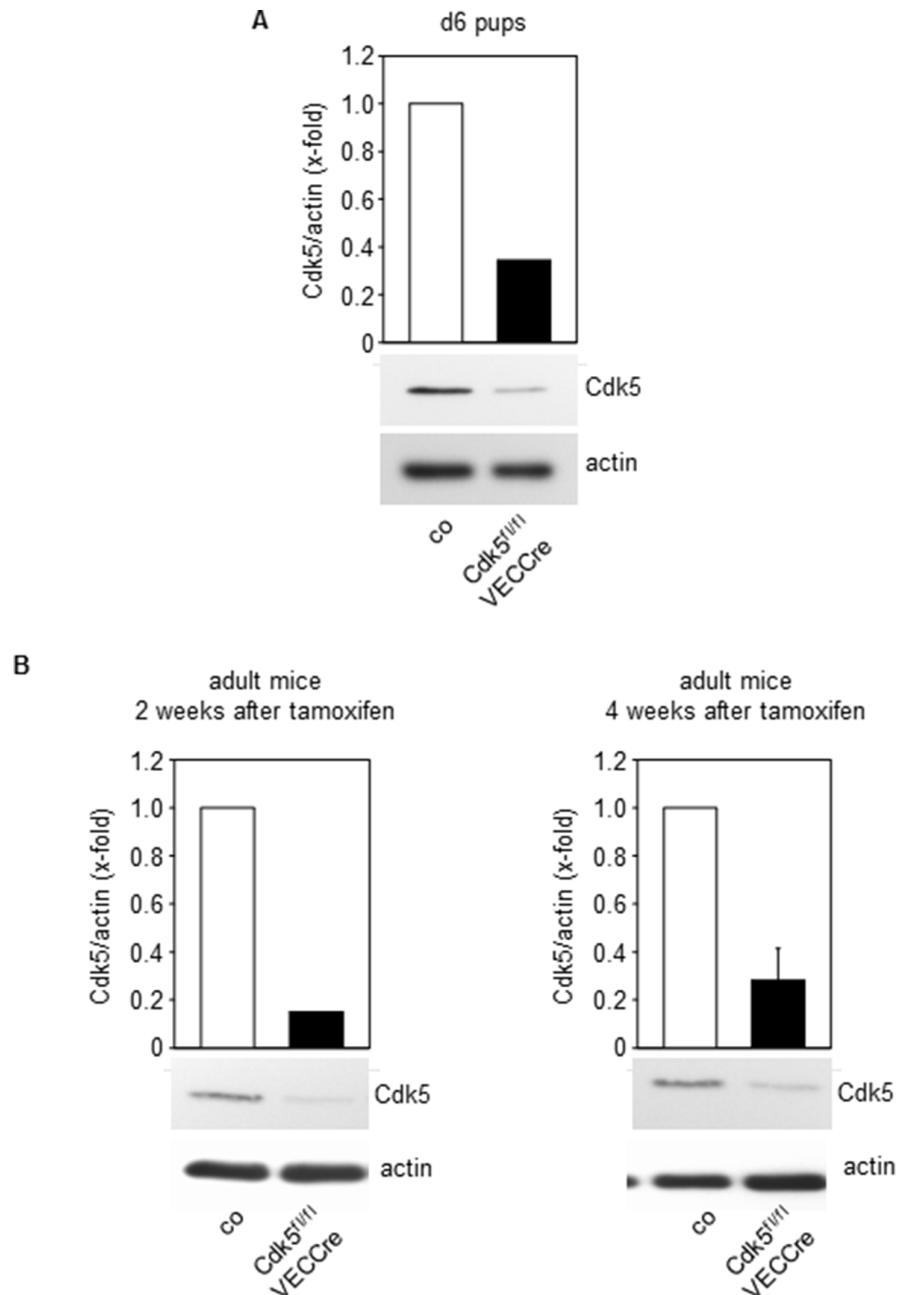

**Supplementary Figure S1: Cdk5 Knockdown in inducible Cdk5<sup>fl/fl</sup>VECCre mice.** (A) Immunoblots and quantitative evaluation of liver sinusoidal endothelial cells (LSECs) of d6 pups with control and Cdk5<sup>fl/fl</sup>VECCre genotype that were injected with tamoxifen (50  $\mu$ g / day i.p.) from day 1 to day 3 for Cdk5 and actin (loading control) is shown (B) Western blots and quantitative evaluations of liver sinusoidal endothelial cells (LSECs) of adult mice with control and Cdk5<sup>fl/fl</sup>VECCre genotype that were injected with tamoxifen (0.5 mg / day i.p.) for five consecutive days two weeks and four weeks after tamoxifen injection for Cdk5 and actin (loading control) are shown.
